# Supplementary material for: The association analysis of hOGG1 genetic variants and gastric cancer risk in a Chinese population
Source: PubMed Central journal article supplement (PMC5323214; doi:10.18632/oncotarget.11802), 2016-09-01
Supplement: oncotarget-07-66061-s001.pdf [file oncotarget-07-66061-s001.pdf]

## The association analysis of *hOGG1* genetic variants and gastric cancer risk in a Chinese population

### SUPPLEMENTARY FIGURE AND TABLES

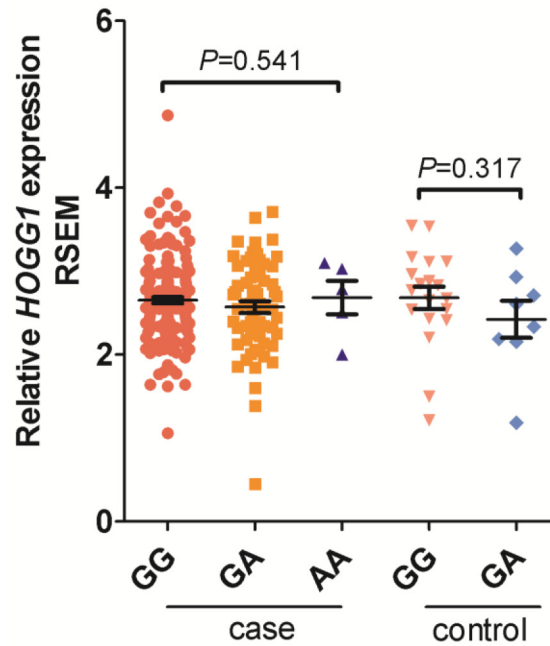

**Supplementary Figure S1: Association between rs125701 polymorphism and the expression levels of *hOGG1* mRNA from The Cancer Genome Atlas database.** There was no significant difference between SNP rs125701 and mRNA expression of *hOGG1* in both gastric cancer patients and cancer-free controls ( $P = 0.541$  and  $0.371$ , respectively).

Supplementary Table S1: Frequency distributions of selected variables between the gastric cancer cases and controls

| Variables             | Cases (n=1275) |      | Controls (n=1436) |      | P <sup>a</sup> |
|-----------------------|----------------|------|-------------------|------|----------------|
|                       | N              | %    | N                 | %    |                |
| Age (years) (mean±SD) | 63.1±10.7      |      | 63.3±11.0         |      | 0.595          |
| Sex                   |                |      |                   |      |                |
| Male                  | 879            | 69.2 | 969               | 67.5 | 0.349          |
| Female                | 392            | 30.8 | 467               | 32.5 |                |
| NA                    | 4              |      |                   |      |                |
| Tumor sites           |                |      |                   |      |                |
| Cardia                | 403            | 33.6 |                   |      |                |
| Non-cardia            | 734            | 61.3 |                   |      |                |
| Both                  | 61             | 5.1  |                   |      |                |
| NA                    | 77             |      |                   |      |                |
| Histological types    |                |      |                   |      |                |
| Diffuse               | 612            | 54.4 |                   |      |                |
| Intestinal            | 513            | 45.6 |                   |      |                |
| NA                    | 150            |      |                   |      |                |
| Depth of invasion     |                |      |                   |      |                |
| Tis                   | 1              | 0.1  |                   |      |                |
| T1                    | 170            | 15.2 |                   |      |                |
| T2                    | 169            | 15.1 |                   |      |                |
| T3                    | 575            | 51.5 |                   |      |                |
| T4                    | 202            | 18.1 |                   |      |                |
| NA                    | 158            |      |                   |      |                |
| Lymph node metastasis |                |      |                   |      |                |
| N0                    | 428            | 35.6 |                   |      |                |
| N1/N2/N3              | 682            | 61.4 |                   |      |                |
| NA                    | 165            |      |                   |      |                |
| Distant metastasis    |                |      |                   |      |                |
| M0                    | 941            | 84.9 |                   |      |                |
| M1                    | 167            | 15.1 |                   |      |                |
| NA                    | 167            |      |                   |      |                |
| TNM stages            |                |      |                   |      |                |
| I                     | 267            | 23.1 |                   |      |                |
| II                    | 284            | 24.6 |                   |      |                |
| III                   | 410            | 35.5 |                   |      |                |
| IV                    | 194            | 16.8 |                   |      |                |
| NA                    | 120            |      |                   |      |                |

<sup>a</sup> Two-sided student t test for the frequency distributions of age between the cases and controlsTwo-sided  $\chi^2$  test for the frequency distributions of sex between the cases and controls

Supplementary Table S2: The genotype frequencies and MAF between the gastric cancer cases and controls

| SNPs               | Allele <sup>a</sup> | Cases <sup>b</sup> | Controls <sup>b</sup> | MAF <sup>c</sup> |          | HWE <sup>d</sup> | P <sup>e</sup> |
|--------------------|---------------------|--------------------|-----------------------|------------------|----------|------------------|----------------|
|                    |                     |                    |                       | Cases            | Controls |                  |                |
| rs1052133(exon)    | G/C                 | 477/591/211        | 525/702/207           | 0.396            | 0.389    | 0.260            | 0.687          |
| rs159153(promoter) | T/C                 | 1030/229/16        | 1146/277/10           | 0.102            | 0.104    | 0.125            | 0.862          |
| rs125701(promoter) | G/A                 | 1159/108/8         | 1334/101/1            | 0.049            | 0.036    | 0.518            | <b>0.018</b>   |

<sup>a</sup> major allele/minor allele of the three SNPs respectively

<sup>b</sup> major homozygote/heterozygote/minor homozygote of the genotypes between the cases and controls

<sup>c</sup> MAF, minor allele frequency in cases and controls

<sup>d</sup> HWE (Hardy–Weinberg equilibrium) test among controls

<sup>e</sup> Adjusted by age, sex in logistic regression analysis in additive model

Supplementary Table S3: Stratification analyses of demographic features between rs125701 genotype and GC risk

| Variables | Genotypes (Cases/Controls) |             |         |            | Adjusted OR<br>(95%CI) <sup>a</sup> | P <sup>a</sup> |
|-----------|----------------------------|-------------|---------|------------|-------------------------------------|----------------|
|           | GG                         |             | AG/AA   |            |                                     |                |
|           | N                          | %           | N       | %          |                                     |                |
| Total     | 1159/1334                  | 90.90/92.90 | 116/102 | 9.1/7.1    | 1.33(1.00,1.75)                     | <b>0.047</b>   |
| Age       |                            |             |         |            |                                     |                |
| ≤ 65      | 644/737                    | 89.82/92.24 | 73/62   | 10.18/7.76 | 1.34(0.94,1.93)                     | 0.109          |
| > 65      | 507/597                    | 92.18/93.72 | 43/40   | 7.82/6.28  | 1.33(0.85,2.11)                     | 0.217          |
| Sex       |                            |             |         |            |                                     |                |
| Male      | 797/900                    | 90.57/92.88 | 83/69   | 9.43/7.12  | 1.32(0.94,1.85)                     | 0.107          |
| Female    | 359/434                    | 91.58/92.93 | 33/33   | 8.42/7.07  | 1.28(0.76,2.16)                     | 0.351          |

<sup>a</sup>Adjusted by age or sex in logistic regression analysis

Supplementary Table S4: The selected tagSNPs and their captured SNPs in *hOGGI*

| TagSNPs     | SNPs captured by TagSNP | Position | Location in gene region | r <sup>2</sup> value |
|-------------|-------------------------|----------|-------------------------|----------------------|
| rs159153    |                         | 9789875  | promoter                |                      |
| rs55814656  |                         | 9795194  | intron                  |                      |
|             | rs3219008               | 9795543  | intron                  | 1.0                  |
| rs55841843  |                         | 9795752  | intron                  |                      |
|             | rs73021447              | 9795910  | intron                  | 0.939                |
| rs2075747   |                         | 9797723  | intron                  |                      |
| rs1052133   |                         | 9798773  | exon                    |                      |
|             | rs2072668               | 9798140  | intron                  | 1.0                  |
|             | rs4021704               | 9800444  | intron                  | 0.901                |
|             | rs73021455              | 9806657  | intron                  | 0.918                |
|             | rs6763347               | 9803796  | intron                  | 0.918                |
|             | rs2304277               | 9801080  | intron                  | 0.858                |
|             | rs7609858               | 9802630  | intron                  | 0.897                |
| rs17252807  |                         | 9803126  | intron                  |                      |
|             | rs7617500               | 9802599  | intron                  | 1.0                  |
| rs293794    |                         | 9803627  | intron                  |                      |
| rs146018083 |                         | 9806884  | intron                  |                      |

Supplementary Table S5: Sequences of primers and probes for *hOGGI* SNPs

| Genetic Variation | Name     | Sequence (5'-3')        |
|-------------------|----------|-------------------------|
| rs1052133         | Primer-F | CCCTCCTACAGGTGCTGTTCA   |
|                   | Primer-R | AACCCTTTCTGCGCTTTGCT    |
|                   | FAM      | CCAATGCCGCCATG          |
|                   | HEX      | CGCCAATCCCGCCA          |
| rs159153          | Primer-F | GGATTACGCAAAGCTGAATGTCT |
|                   | Primer-R | CAGCAAAGAGAGCCCCTGTT    |
|                   | FAM      | TGCTCAGCACAGGG          |
|                   | HEX      | AAGGTGCTCAACACA         |
| rs125701          | Primer-F | GGTCTCTGGCTGGGACACAA    |
|                   | Primer-R | CCCAGACTGCAAATTCTTGAAGA |
|                   | FAM      | CAATCCGCTGCAGAT         |
|                   | HEX      | TCAATCCACTGCAGATG       |
